# Supplementary material for: Molecular and Morphological Changes Induced by Leonardite-based Biostimulant in Beta vulgaris L
Source: Plants (Basel). 2019 Jun 18;8(6):181. doi: 10.3390/plants8060181 (PMC6630732; doi:10.3390/plants8060181)
Supplement: Supplementary file 1 [file plants-08-00181-s001.xlsx]

## Sheet: Tab.1
Supplementary material. Sequences of primers designed for the Real-time PCR experiments.
Gene name	Assay ID	Forward Primer Seq.	Reverse Primer Seq.	Gene function
Bv_008410_outo	AII1OGA	ATCCCAGTTACCAGCTTGCT	ACCAGACCCATCAACCCAAT	Cytokinin riboside 5-monophosphate phosphoribo hydrolase
Bv_05920_sapz	AI0IYVP	GGATGAGGAGTATGAAGCAGTTGTG	ACAGCTGTAGTAACATGAGTATCTTTGT	BRASSINOSTEROID INSENSITIVE 1-associated receptor kinase 1
Bv_24910_jato	AIVI56U	GCAGCAAACAAACGGTTGGAAA	TCTCAAAAACATCACAGGAAACAGGAA	Aspartic proteinase-like protein 1 EC=3.4.23.-; Flags: Precursor;
Bv_30700_jwmm	AI89L3A	TCACGTTGTTACAGAATGCATGGA	CTCAGGTAAACCGAGACTGCAA	MLO-like protein 11
Bv_34780_rqdw	AI70NW1	CAAAGGTGGTAAAGACGATTCTAGTAGT	TTTTGGTCGAACGTCTTCAATGC	S-adenosylmethionine decarboxylase proenzyme Short=AdoMetDC;
Bv_36700_auze	AIWR4C2	AGGGCTTTGGCATTACTTCATCAAT	TGAGTTGATTTTGAAGGAGGTAGTGTTC	Inositolphosphorylceramide-B C-26 hydroxylase
Bv1_001950_imjw	AID1VRQ	AAGGTGATCCAATTCCAGGAACTG	TCGAGGCTATGCCTTCAGGATA	dsRNA-specific nuclease Dicer and related ribonucleases
Bv1_004580_xnrs	AIGJR36	TGCCTTTGTTTTCCGGTCTCTTA	AGGTTGGGATATCATCAGGAGCTAA	Cysteine synthase, chloroplastic/chromoplastic, O-acetylserine sulfhydrylase;
Bv1u_019170_ogom	AIAA083	GGGCAAAAGCTCATCAAATTCATCA	AACAACAACAAAGCCAGCATCAA	Endoplasmic reticulum glucose-regulated protein (GRP94/endoplasmin), HSP90 family
Bv2_025660_etua	AIY90PH	GTTGGCAAGACAAAGGAGACATTG	AACCAATCATGTAAAGGTCCACAGAA	Laccase
Bv2_035240_udsn	AIHSQAE	CCCTTCCATTGGTCTAACAGAGAA	TGAAGCAAGAAGAGGGTACAATCC	Heat shock transcription factor
Bv2_038430_dqyh	AI39TED	GAGAAAGAGGAGTAACATCAAGAAGCA	CAGCTATCTTGAGTGGTGAAGGAAA	Heat shock cognate 70 kDa protein 2
Bv2_044340_tatw	AIX02JA	ACTTGTCAATACTACACAATTTTATAATTTCATCAATAACATTTT	GGCGGAATTTGTGGGATGTC	Sulfotransferase
Bv2u_047030_nuxd	AI39TEE	AGCTCTTTCATTGGGAATCTTCAACT	GCCAAAAGAAGGAGATGGTGCTT	Leucine-rich repeat (LRR) protein
Bv3_049600_wxxy	AILJKS3	TGGCGGAAAGTGGGTAGTC	AACCCTTTGCTTCTTTCGATTTTGG	high affinity inorganic phosphate transporter
Bv3_052080_jtjm	AI5IRKL	CCTTAACAGCACCCTCGATCTT	AGAACCAAGTGAATGACAAGGACAA	Luminal-binding protein
Bv3_054270_kkpk	AIGJR37	GTATCACATAGTGCTCTAAAGTTGGGTAA	AGTAAAATATGCCCAACTATCATCAAGCTTT	Calmodulin-binding transcription activator 5
Bv3_055540_hfjn	AIAA082	GCTTCACTCCTCCCATCTTTTCTAT	CAGACGTGGTCGTGATAGGAT	Methyltransferase-like protein 1
Bv3_057000_nenr	AIWR4C1	GGGATGAAGAGAGAGTGAACAATGAA	TCATGCGTCTTGCACATTTGTTTT	Glutamate/leucine/phenylalanine/valine dehydrogenases
Bv3_062700_tcwq	AIQJDHY	AGCTTCCGTATGTTCATGTTCGT	CGTTCAGCTAAGCTATGGCTAT	Transcription factor bHLH48 AltName:
Bv3_063630_mpup	AIKAMMV	GAACCTCAATTTAGCCTAGCCGTTA	TGATTTTGTTTTTCTATCCTTTGGACTTCAC	Thioredoxin reductase (NADPH)
Bv3_064750_fpmx	AICSXLI	GATGGCAGCAGAACCAAAGTTT	TGAACTCTTGAGAAGTCTTTCAATAAGTTTTCT	Two-component response regulator ARR9
Bv3_065290_srwc	AI1RW1X	AGCATATGGTTCAGTAAAATGGTGGAA	TGGAATGAAAGAAGTGGTACTGCAA	Auxin efflux carrier component 1
Bv3_067750_fztq	AIBJZFB	TGGTACTGATCCAAAAGATGCAGAAT	CCTGCATCTGACAGCTCTACTG	Heat stress transcription factor A-5
Bv4_079980_yozf	AIX02I9	CTGCAATCTCGTCGTTGGTAAC	TTCACACCGTCCTCATCTCAAC	S-adenosylmethionine synthetase 1, AdoMet
Bv5_119310_kswa	AIMSIZB	CCTCCTAGTTTCTCCTCAGCTATCA	CATAAGTGTCAGCCCATAGACCTTT	Inorganic phosphate transporter 1-7
Bv5_119750_ywjf	AI20U75	GGAGCTTCAGAGGATCAGATCAAAA	TCGCTTCCTCATTTCCTTGATTCTT	DnaJ homolog subfamily B member 11
Bv5_120330_zdrp	AIN1G5J	CTGCATATTCTTCAGCATAACCCATTTT	CAGTTCATGTAAATGACATAGAATGGGATCA	Stachyose synthase
Bv5u_123730_dagi	AIPAFBQ	CACAATAACTCTGCCCAAATAATCTTT	CACCCATCCAGGTCTACTCAGA	Beta-Amylase 3702.AT4G17090.1
Bv6_126170_qykn	AIKAMMU	CACAAGAGGCAGGGAACGT	GAAAGCTCTTCCACCTCTCTAACAA	CDK5 activator-binding protein
Bv6_137080_njqn	AILJKS2	AGGCTAAATATGATGAATACCAAATTG	GCTGAGGGAATCCATTGAAGCA	4-alpha-glucanotransferase, chloroplastic/amyloplastic
Bv6_137840_uaap	AIY90PI	CCTCACAAATTTGCCCTCTCCTA	CAACCCGTTTCCTTGATGGATAAC	Flavonol sulfotransferase-like
Bv6_145280_yezp	AID1VRR	CCTGCCATTGTGGAATATGTACTCA	CTCACACCAGAAAAGGAAAATGCT	Transcriptional coactivator p100
Bv6_152730_ryjy	AI5IRKM	CAGACCAAAGAGAAAGATTGACATTTTCA	TCTGTCTCCAGTATAGTTCTCCTACTCT	Vesicle transport v-SNARE 12
Bv7_156890_eowm	AIMSIZA	TCCTGATTTTAAGTTAGCAGTGAACCAT	GTGAAAGCGCGAGACTCTTCT	3-ketoacyl-CoA synthase 17
Bv7_157460_rcod	AII1OGN	GGTGTTTTGACTCGAAGACTTGAC	GCTGTTTGGAGAATGACCAATACCA	2-Cys peroxiredoxin BAS1, chloroplastic
Bv7_157840_przp	AIFATXZ	GTTTATTCATTTGTAATTTACTCTTTTACCCTAAACACT	GTGGGAAATTCATGTCCTGTTACAC	Mitochondrial import inner membrane translocase
Bv7_165780_dcxg	AI20L89	CATTTAACTGCCGACCACCC	CTGTGTCGCCGTCTTGTTAG	Gibberellin receptor gid1b-like
Bv7_176160_uqiw	AIN1G5I	CATCAGAGTTATTTGCAGACTATGTCTCT	GGCGAGGAGTAATACCATTTGTCT	Glycogen phosphorylase
Bv7u_180460_dcmt	AIT970M	GCCTTTTCTGCTTCTTCAACTGTAC	TTACAACAGGGAGACTGATAGGAGTAG	28 kDa ribonucleoprotein, chloroplastic Short=28RNP;
Bv8_183530_yxcq	AIPAFBR	CACCCCGACAATGTTAAGGATGAT	CTATGTTTTCAAGTGGACTACCCTTCT	Cellulose synthase A catalytic subunit 8 [UDP-forming]
Bv8_184830_opag	AIBJZFA	ACCCAGGTTAATGAACATGGAACAT	GCCAACTCATCACTGCCTTTG	Auxin response factor 3
Bv8_185010_swpc	AI6RPQT	AAAGCGGATTAGCCTGAAGGT	GCATTACCCTCTCCTCGAACTCT	Chaperone protein dnaJ
Bv8_196710_fwxw	AI6RPQU	GAGCCTGTTATACCTGGGCTTAATAAT	TCACCACCACCAACAACAACA	Polyadenylation factor I complex, subunit FIP1, Pre-mRNA 3'-end-processing factor FIP1
Bv8_199730_kxjp	AIRSBN6	GAGTTGCTTAGCAAGTTCAATGGAA	GTGAGCTACAACTTAGGAGGAATGG	3-ketoacyl-CoA synthase 11
Bv8_201480_rddu	AICSXLJ	CGCTCTAAGAAAAGCTCGAAACTTG	TCTACAAGGTTTATCATAGGAGGGCTAA	Predicted E3 ubiquitin ligase
Bv8_203060_pggz	AIS09UE	GGCATTTGCAAAAGAGTCTATGGAA	CAATCTTTAACTGTGCATTTCGAACCA	Acyl-CoA synthetase
Bv9_209120_pzcg	AIFATXY	AGCAGTAGTATGAGGTATGATCAGAGTTT	GTCTCCAGACATGGCTTTGGT	BEL1-like homeodomain protein 9
Bv9_209300_pjcz	AIHSQAF	GTAAAATGAAAGGGATTGCATTCATAAAGG	CAGCAGCAACATTTCCAATTGTCTT	Glyoxalase
Bv9_210120_xaea	AI0IYVQ	CCACCCACTCCTTCATTTCACATAG	GATGAAGGGCTATTGCAAACAGTTT	Putative pentatricopeptide repeat-containing protein At1g19290
Bv9_216450_izsj	AI1RW1Y	ACTCTATGGTGGGTCTAGCTCTTTT	GGATCAGCACCAACAATCAATGC	Chalcone synthase
Bv9_225110_xpzj	AI70NW2	ACCTTGTAGAGTCTCCCCAAATAGG	TCAGACGATCTCGTTTATTGTTTGGAT	Apoptotic ATPase,Putative disease resistance RPP13-like protein 1
Bv9_228150_kecu	AI89L29	GAAGTTAAGGATTGCCGAGTTTCC	CACCTTCAACACACCAGAAATGG	Dehydration-responsive element-binding protein 3
BV2_037220_rayf	AIQJDHZ	CTATGCATCTTCACTTTGAAACAGTTTT	CTAGAAGAGGCTGACGAGAAAGAAG	Tubulin (Housekeeping)
BV5_107870_ygnn	AIRSBN7	GAGCAAGACAATTGGTGGTACAG	CACGAATACAAGTCAGACCTTCACA	GAPDH (Housekeeping)
BV6_127000_pera	AIS09UF	GTTCCTGGCCGGAATCTATGG	GCCAAGAAAGCAATTAGCAACAAAA	Histone H3 (Housekeeping)
